# Supplementary material
Source: Royal Society of Chemistry journal article supplement (doi:10.1039/d6ta00467a)
Supplement: d6ta00467a1.pdf [file d6ta00467a1.pdf]

## Supplementary Data

### Creating Percolating Li Diffusion Pathways via Ge substitution Enables Thick-Electrode Oxide All-Solid-State Batteries

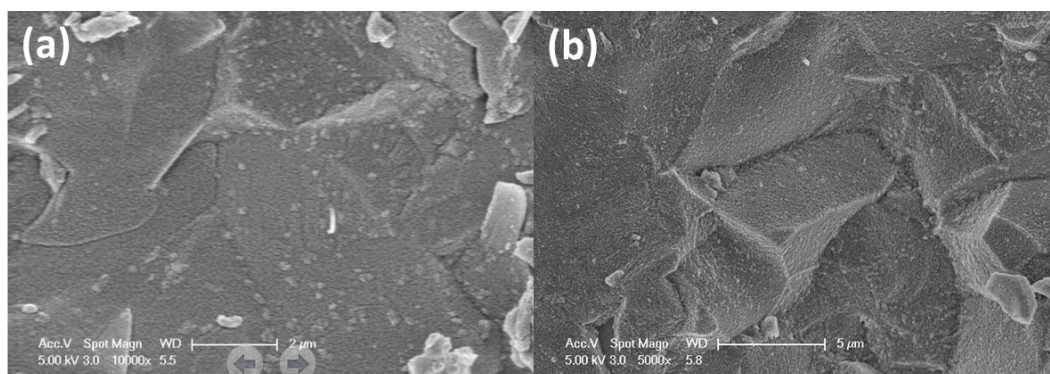

Supplementary Figure S1. Cross-section SEM images of LISICON SEs (a) bare LSPO (b) Ge50

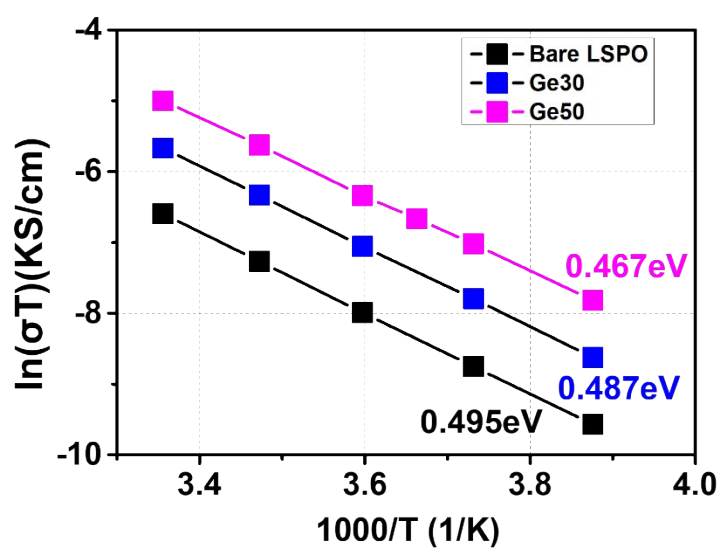

Supplementary Figure S2. Arrhenius plots and corresponding activation energies of bare LSPO, Ge30, and Ge50

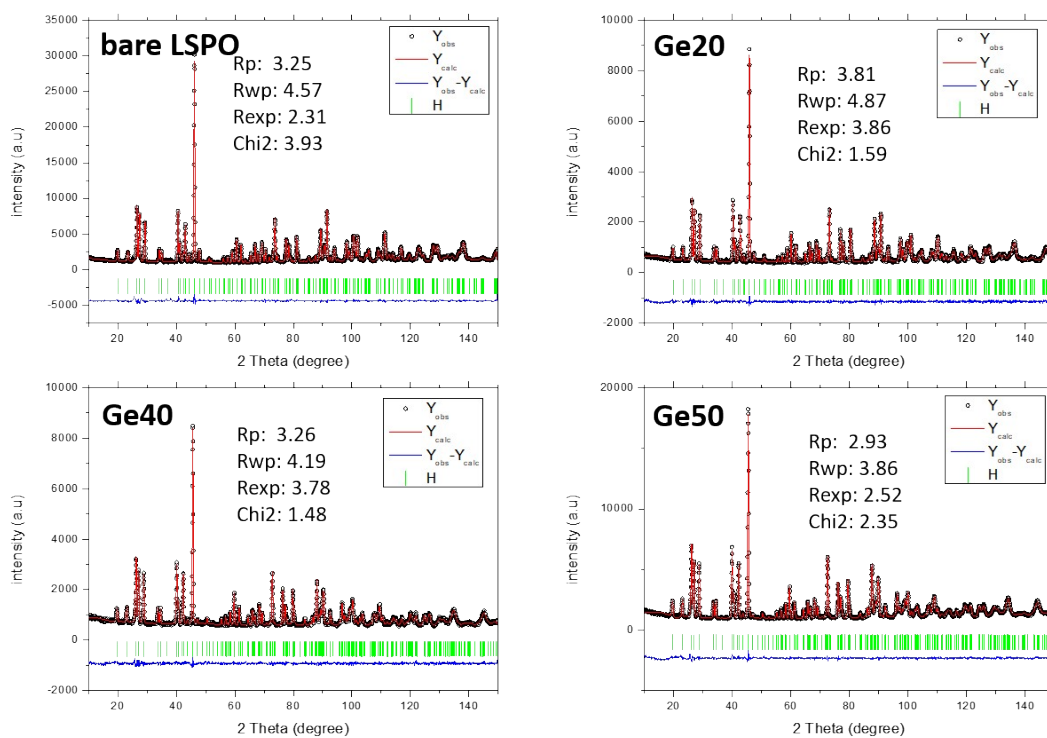

Supplementary Figure S3. Rietveld refinement results of NPD measurement for bare LSPO and Ge-substituted LISICON

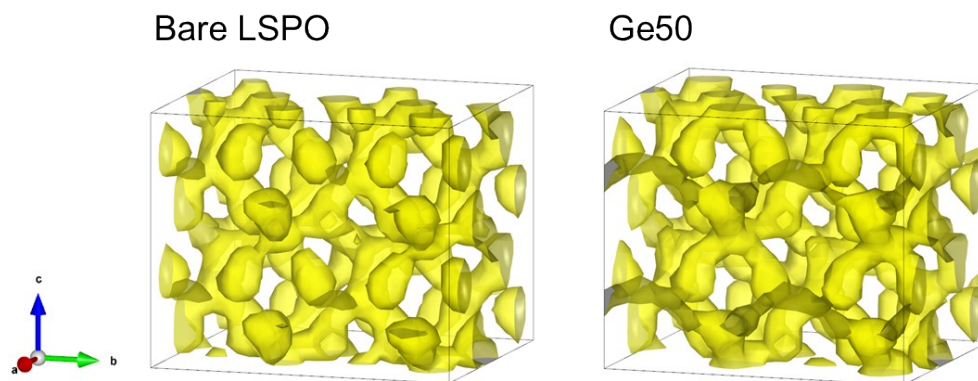

Supplementary Figure S4. Probability density distribution plot of bare LSPO and Ge50

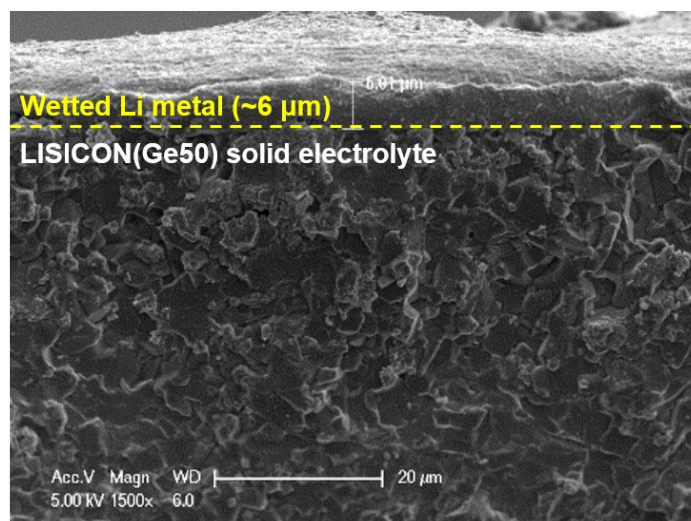

Supplementary Figure S5. Cross-section SEM image of Li-metal-wetted Ge50 solid electrolyte. The wetting process was conducted at 250 °C, and a thin Li metal layer (~6 μm) was formed by gently wiping the surface of the molten Li metal during the wetting process.

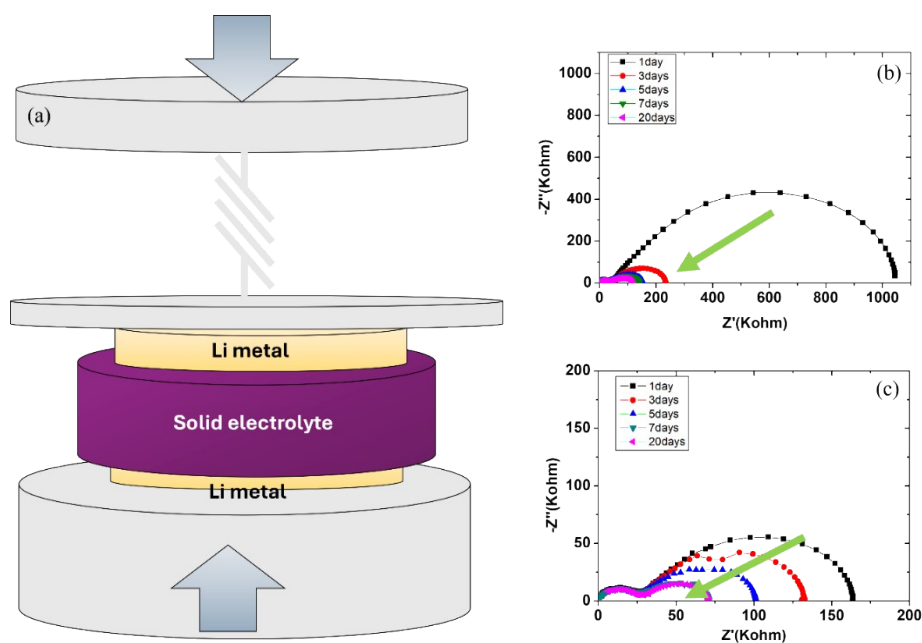

Supplementary Figure S6. Time-dependent impedance spectra of Li|SE|Li symmetric cells measured using a (a) Swagelok-type cell. EIS result of (b) Li|bare LSPO|Li and (c) Li|Ge10|Li. The bulk resistance remains unchanged, while the interfacial resistance gradually decreases, indicating stable interfacial behavior.

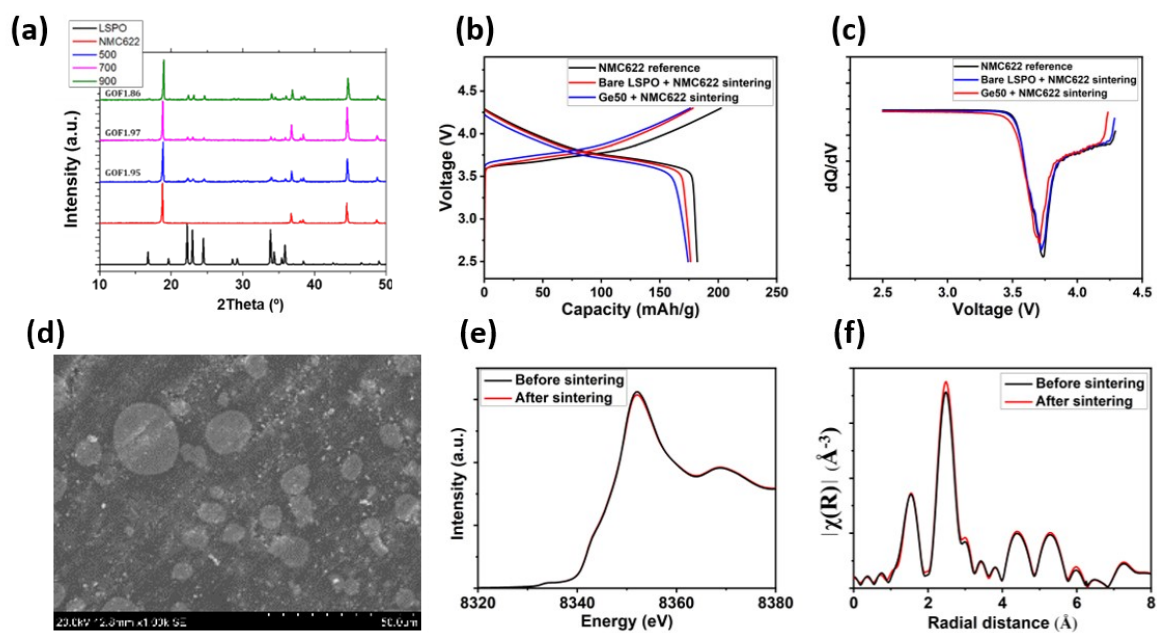

Supplementary Figure S7. Chemical & electrochemical stability confirmation test. (a) XRD patterns of bare LSPO,  $\text{LiNi}_{0.6}\text{Mn}_{0.2}\text{Co}_{0.2}\text{O}_2$  (NMC622), and *ex-situ* analysis of the co-sintered NMC622 with the Ge50 at 500°C, 700°C, and 900°C. (b) Voltage curves and (c) dQ/dV plots of the NMC622 sample, and the NMC622 co-sintered samples with bare LSPO and Ge50. (d) Cross-section SEM image of the NMC622 co-sintered pellet with Ge50. (e), (f) XANES, EXAFS data of the NMC622 co-sintered sample with Ge50.

The co-sintered NMC622 samples with Ge50 even at 900 °C did not show any impurity phases. The crystalline structures of both Ge50 and NMC622 phase were well maintained without any secondary phases. Electrochemical properties of the co-sintered samples were evaluated by using electrochemical cell test with liquid electrolyte with the voltage range from 4.3V to 2.5V at 0.1C rate at room temperature. A slight polarization was observed in the co-sintered samples, but no noticeable change occurred in the electrochemical reaction behavior of NMC622. Ni oxidation number and local structure remained nearly unchanged before and after the heat treatment, confirming that Ge-substituted LISICON maintains excellent chemical/ electrochemical compatibility with NMC622.

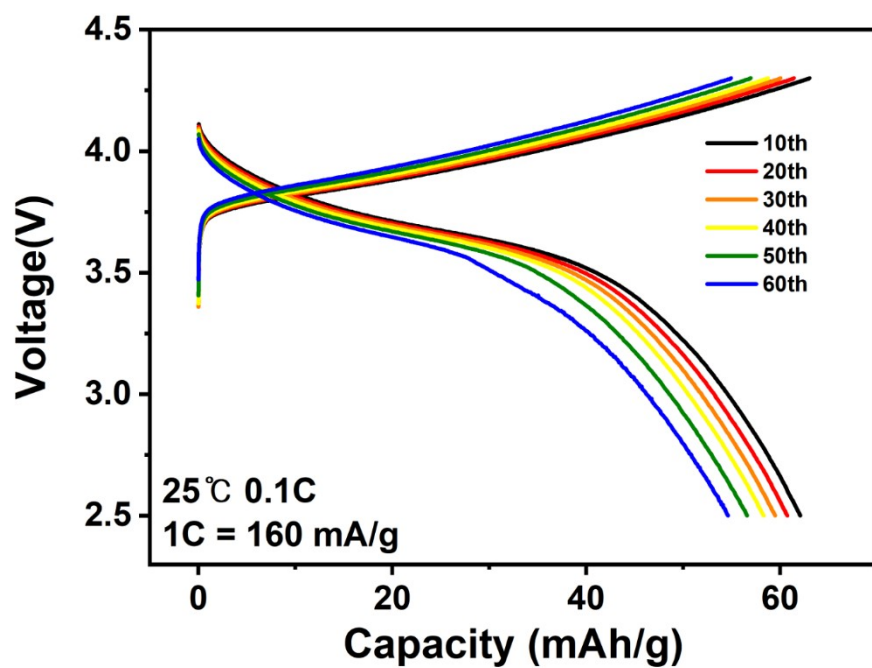

Supplementary Figure S8. Voltage-capacity profile of Figure 7(c)

| Sample | Density ( $g\ cm^{-3}$ ) | Calculated density ( $g\ cm^{-3}$ ) | Relative density (%) |
|--------|--------------------------|-------------------------------------|----------------------|
| LSPO   | 2.400                    | 2.4050                              | 99.79                |
| Ge10   | 2.476                    | 2.4805                              | 99.82                |
| Ge20   | 2.512                    | 2.5560                              | 98.28                |
| Ge30   | 2.559                    | 2.6315                              | 97.24                |
| Ge40   | 2.648                    | 2.7070                              | 97.82                |
| Ge50   | 2.748                    | 2.7825                              | 98.76                |

Supplementary Table S1. Density profiles of sintered LSPO and Ge-substituted LSPOs pellets.

All pellets exhibited high relative densities in the range of 97.2–99.8%, indicating comparable densification among the samples.

| <b>Li<sub>3.5</sub>Si<sub>0.5</sub>P<sub>0.5</sub>O<sub>4</sub></b> |                  |                               |            |                                |           |                                 |
|---------------------------------------------------------------------|------------------|-------------------------------|------------|--------------------------------|-----------|---------------------------------|
| <i>S.G.:Pnma;</i>                                                   |                  |                               |            | <i>Z = 4</i>                   |           |                                 |
| <i>a = 10.5924Å</i>                                                 |                  | <i>b = 6.1188Å</i>            |            | <i>c = 5.0028Å</i>             |           | <i>V = 324.248Å<sup>3</sup></i> |
| <i>R<sub>p</sub> = 3.25%</i>                                        |                  | <i>R<sub>wp</sub> = 4.57%</i> |            | <i>R<sub>exp</sub> = 2.31%</i> |           | <i>χ<sup>2</sup> = 3.93</i>     |
| <b>Atomic position</b>                                              |                  |                               |            |                                |           |                                 |
| Atom                                                                | Wyckoff position | <i>x/a</i>                    | <i>y/b</i> | <i>z/c</i>                     | Occupancy | Biso                            |
| Li1                                                                 | 8d               | 0.33249                       | -0.00201   | 0.81732                        | 0.775     | 1.204                           |
| Li2                                                                 | 4c               | 0.57026                       | 0.25000    | 0.81399                        | 0.390     | 0.968                           |
| Li3                                                                 | 4c               | 0.58040                       | 0.25000    | 0.62280                        | 0.088     | 0.932                           |
| Li4                                                                 | 8d               | 0.47918                       | 0.46324    | 0.93008                        | 0.135     | 0.932                           |
| Li5                                                                 | 8d               | 0.66486                       | 0.45007    | 0.35474                        | 0.198     | 3.443                           |
| Li6                                                                 | 4c               | 0.75923                       | 0.25000    | 0.59158                        | 0.077     | 1.341                           |
| O1                                                                  | 8d               | 0.34059                       | 0.03820    | 0.21980                        | 1.000     | -                               |
| O2                                                                  | 4c               | 0.05205                       | 0.25000    | 0.27983                        | 0.500     | -                               |
| O3                                                                  | 4c               | 0.41068                       | 0.25000    | 0.64254                        | 0.500     | -                               |
| Si1                                                                 | 4c               | 0.41007                       | 0.25000    | 0.32511                        | 0.250     | -                               |
| P1                                                                  | 4c               | 0.41007                       | 0.25000    | 0.32511                        | 0.250     | -                               |
| Ge1                                                                 | -                | -                             | -          | -                              | -         | -                               |

| <b>Li<sub>3.6</sub>Ge<sub>0.2</sub>Si<sub>0.4</sub>P<sub>0.4</sub>O<sub>4</sub></b> |                  |                               |            |                                |           |                                 |
|-------------------------------------------------------------------------------------|------------------|-------------------------------|------------|--------------------------------|-----------|---------------------------------|
| <i>S.G.:Pnma;</i>                                                                   |                  |                               |            | <i>Z = 4</i>                   |           |                                 |
| <i>a = 10.6613Å</i>                                                                 |                  | <i>b = 6.1474Å</i>            |            | <i>c = 5.0377Å</i>             |           | <i>V = 330.164Å<sup>3</sup></i> |
| <i>R<sub>p</sub> = 3.81%</i>                                                        |                  | <i>R<sub>wp</sub> = 4.87%</i> |            | <i>R<sub>exp</sub> = 3.86%</i> |           | <i>χ<sup>2</sup> = 1.59</i>     |
| <b>Atomic position</b>                                                              |                  |                               |            |                                |           |                                 |
| Atom                                                                                | Wyckoff position | <i>x/a</i>                    | <i>y/b</i> | <i>z/c</i>                     | Occupancy | Biso                            |
| Li1                                                                                 | 8d               | 0.33421                       | -0.00286   | 0.81966                        | 0.767     | 1.174                           |
| Li2                                                                                 | 4c               | 0.56978                       | 0.25000    | 0.81565                        | 0.391     | 0.744                           |
| Li3                                                                                 | 4c               | 0.63443                       | 0.25000    | 0.59547                        | 0.098     | 1.055                           |
| Li4                                                                                 | 8d               | 0.48564                       | 0.45502    | 0.93915                        | 0.141     | 0.932                           |
| Li5                                                                                 | 8d               | 0.65571                       | 0.47037    | 0.36863                        | 0.200     | 3.596                           |
| Li6                                                                                 | 4c               | 0.74115                       | 0.25000    | 0.52992                        | 0.093     | 5.414                           |
| O1                                                                                  | 8d               | 0.33963                       | 0.03530    | 0.22301                        | 1.000     | -                               |
| O2                                                                                  | 4c               | 0.05433                       | 0.25000    | 0.27699                        | 0.500     | -                               |
| O3                                                                                  | 4c               | 0.41048                       | 0.25000    | 0.65201                        | 0.500     | -                               |

|     |    |         |         |         |       |   |
|-----|----|---------|---------|---------|-------|---|
| Si1 | 4c | 0.41080 | 0.25000 | 0.33039 | 0.200 | - |
| P1  | 4c | 0.41080 | 0.25000 | 0.33039 | 0.200 | - |
| Ge1 | 4c | 0.41080 | 0.25000 | 0.33039 | 0.100 | - |

| <b>Li<sub>3.7</sub>Ge<sub>0.4</sub>Si<sub>0.3</sub>P<sub>0.3</sub>O<sub>4</sub></b> |                  |                               |              |                                |           |                                 |
|-------------------------------------------------------------------------------------|------------------|-------------------------------|--------------|--------------------------------|-----------|---------------------------------|
| <i>S.G.:Pnma;</i>                                                                   |                  |                               | <i>Z = 4</i> |                                |           |                                 |
| <i>a = 10.72227Å</i>                                                                |                  | <i>b = 6.17173Å</i>           |              | <i>c = 5.0753</i>              |           | <i>V = 335.855Å<sup>3</sup></i> |
| <i>R<sub>p</sub> = 3.26%</i>                                                        |                  | <i>R<sub>wp</sub> = 4.19%</i> |              | <i>R<sub>exp</sub> = 3.45%</i> |           | <i>χ<sup>2</sup> = 1.48</i>     |
| <b>Atomic position</b>                                                              |                  |                               |              |                                |           |                                 |
| Atom                                                                                | Wyckoff position | <i>x/a</i>                    | <i>y/b</i>   | <i>z/c</i>                     | Occupancy | Biso                            |
| Li1                                                                                 | 8d               | 0.33609                       | -0.00104     | 0.82233                        | 0.754     | 1.461                           |
| Li2                                                                                 | 4c               | 0.56643                       | 0.25000      | 0.82791                        | 0.384     | 0.908                           |
| Li3                                                                                 | 4c               | 0.60684                       | 0.25000      | 0.62886                        | 0.097     | 0.245                           |
| Li4                                                                                 | 8d               | 0.47009                       | 0.48095      | 0.92467                        | 0.145     | 0.787                           |
| Li5                                                                                 | 8d               | 0.66874                       | 0.47209      | 0.36647                        | 0.237     | 3.596                           |
| Li6                                                                                 | 4c               | 0.69910                       | 0.25000      | 0.53841                        | 0.093     | 1.627                           |
| O1                                                                                  | 8d               | 0.33914                       | 0.03023      | 0.22530                        | 1.000     | -                               |
| O2                                                                                  | 4c               | 0.05643                       | 0.25000      | 0.27743                        | 0.500     | -                               |
| O3                                                                                  | 4c               | 0.41108                       | 0.25000      | 0.66187                        | 0.500     | -                               |
| Si1                                                                                 | 4c               | 0.41278                       | 0.25000      | 0.33484                        | 0.150     | -                               |
| P1                                                                                  | 4c               | 0.41278                       | 0.25000      | 0.33484                        | 0.150     | -                               |
| Ge1                                                                                 | 4c               | 0.41278                       | 0.25000      | 0.33484                        | 0.200     | -                               |

| <b>Li<sub>3.75</sub>Ge<sub>0.5</sub>Si<sub>0.25</sub>P<sub>0.25</sub>O<sub>4</sub></b> |                  |                               |              |                                |           |                                 |
|----------------------------------------------------------------------------------------|------------------|-------------------------------|--------------|--------------------------------|-----------|---------------------------------|
| <i>S.G.:Pnma;</i>                                                                      |                  |                               | <i>Z = 4</i> |                                |           |                                 |
| <i>a = 10.7436Å</i>                                                                    |                  | <i>b = 6.19161Å</i>           |              | <i>c = 5.0857Å</i>             |           | <i>V = 338.301Å<sup>3</sup></i> |
| <i>R<sub>p</sub> = 2.93%</i>                                                           |                  | <i>R<sub>wp</sub> = 3.86%</i> |              | <i>R<sub>exp</sub> = 2.52%</i> |           | <i>χ<sup>2</sup> = 2.35</i>     |
| <b>Atomic position</b>                                                                 |                  |                               |              |                                |           |                                 |
| Atom                                                                                   | Wyckoff position | <i>x/a</i>                    | <i>y/b</i>   | <i>z/c</i>                     | Occupancy | Biso                            |
| Li1                                                                                    | 8d               | 0.33229                       | 0.00318      | 0.82241                        | 0.740     | 1.375                           |
| Li2                                                                                    | 4c               | 0.56997                       | 0.25         | 0.8311                         | 0.382     | 1.593                           |
| Li3                                                                                    | 4c               | 0.61167                       | 0.25         | 0.60856                        | 0.107     | 0.245                           |
| Li4                                                                                    | 8d               | 0.47749                       | 0.48802      | 0.9416                         | 0.165     | 0.787                           |
| Li5                                                                                    | 8d               | 0.66927                       | 0.4695       | 0.36407                        | 0.242     | 0.778                           |
| Li6                                                                                    | 4c               | 0.71094                       | 0.25         | 0.50432                        | 0.105     | 2.885                           |
| O1                                                                                     | 8d               | 0.33936                       | 0.02995      | 0.22662                        | 1.000     | -                               |
| O2                                                                                     | 4c               | 0.05848                       | 0.25         | 0.2761                         | 0.500     | -                               |
| O3                                                                                     | 4c               | 0.41144                       | 0.25         | 0.66536                        | 0.500     | -                               |
| Si1                                                                                    | 4c               | 0.41312                       | 0.25         | 0.33819                        | 0.125     | -                               |
| P1                                                                                     | 4c               | 0.41312                       | 0.25         | 0.33819                        | 0.125     | -                               |
| Ge1                                                                                    | 4c               | 0.41312                       | 1/4          | 0.33819                        | 0.250     | -                               |

Supplementary Table S2. Rietveld refinement results of NPD measurement for bare LSPO, Li<sub>3.6</sub>Ge<sub>0.2</sub>Si<sub>0.4</sub>P<sub>0.4</sub>O<sub>4</sub>(Ge20), Li<sub>3.7</sub>Ge<sub>0.4</sub>Si<sub>0.3</sub>P<sub>0.3</sub>O<sub>4</sub>(Ge40), Li<sub>3.75</sub>Ge<sub>0.5</sub>Si<sub>0.25</sub>P<sub>0.25</sub>O<sub>4</sub>(Ge50)

| <i>S.G.:Pnma</i>  |        |       |       |
|-------------------|--------|-------|-------|
| Lattice parameter | a      | b     | c     |
| Bare LSPO         | 10.594 | 6.116 | 5.006 |

|       |        |       |       |
|-------|--------|-------|-------|
| 500°C | 10.576 | 6.118 | 5.006 |
| 700°C | 10.586 | 6.120 | 5.006 |
| 900°C | 10.598 | 6.118 | 5.011 |

Units: Å

| <i>S.G.:R – 3m</i> |       |        |       |
|--------------------|-------|--------|-------|
| Lattice parameter  | a     | c      | c/a   |
| NMC622             | 2.870 | 14.226 | 4.953 |
| 500°C              | 2.867 | 14.212 | 4.957 |
| 700°C              | 2.867 | 14.213 | 4.953 |
| 900°C              | 2.869 | 14.217 | 4.955 |

Units: Å

Supplementary Table S3. Refined XRD patterns' lattice parameters of supplementary figure S4(a)

|                                   | <b>Item</b>           | <b>Information</b>                                                                                                               |
|-----------------------------------|-----------------------|----------------------------------------------------------------------------------------------------------------------------------|
| <b>Materials properties</b>       | Cathode material      | LiNi <sub>0.6</sub> Co <sub>0.2</sub> Mn <sub>0.2</sub> O <sub>2</sub> (NCM622), $\rho = 4.7 \text{ g cm}^{-3}$                  |
|                                   | Solid electrolyte(SE) | Li <sub>3.75</sub> Ge <sub>0.5</sub> Si <sub>0.25</sub> P <sub>0.25</sub> O <sub>4</sub> (Ge50), $\rho = 2.65 \text{ g cm}^{-3}$ |
|                                   | Anode material        | Li metal, $\rho = 0.53 \text{ g cm}^{-3}$                                                                                        |
| <b>Electrochemical properties</b> | Discharge capacity    | 122 mAh g <sup>-1</sup>                                                                                                          |
|                                   | Areal capacity        | 4.490 mAh cm <sup>-2</sup>                                                                                                       |
|                                   | Areal energy          | 16.89 mAh cm <sup>-2</sup>                                                                                                       |
| <b>ASSB components</b>            | Cathode composite     | Thickness = 140 $\mu\text{m}$ , volume = 0.00704 cm <sup>3</sup> , mass = 27.7 mg                                                |
|                                   | SE disk               | Thickness = 50 $\mu\text{m}$ , volume = 0.00251 cm <sup>3</sup> , mass = 6.66 mg                                                 |
|                                   | Li metal anode        | Thickness = 6 $\mu\text{m}$ , volume = 0.000302 cm <sup>3</sup> , mass = 0.16 mg                                                 |
|                                   | Total stack           | Volume = 0.009862 cm <sup>3</sup> , Mass = 34.52 mg                                                                              |
| <b>Energy density</b>             | Volumetric            | 860.88 Wh L <sup>-1</sup>                                                                                                        |
|                                   | Gravimetric           | 245.94 Wh kg <sup>-1</sup>                                                                                                       |

Supplementary Table S4. Detailed component information for energy density calculations
